# Supplementary material for: GABA Analogue HSK16149 in Chinese Patients With Diabetic Peripheral Neuropathic Pain: A Phase 3 Randomized Clinical Trial
Source: PubMed Central journal article supplement — JAMA Netw Open. 2024 Aug 19;7(8):e2425614. doi: 10.1001/jamanetworkopen.2024.25614 (PMC11333976; doi:10.1001/jamanetworkopen.2024.25614), 2024-08-19
Supplement: jamanetwopen-e2425614-s003.pdf [file jamanetwopen-e2425614-s003.pdf]

## Data Sharing Statement

Guo. GABA Analogue HSK16149 in Chinese Patients With Diabetic Peripheral Neuropathic Pain. *JAMA Netw Open*. Published August 19, 2024.

doi:10.1001/jamanetworkopen.2024.25614

### Data

**Data available:** No

**Additional Information:** Explanation for why data not available: If there is any unavailable data in the article, please get in touch with the corresponding author; information will be provided upon reasonable request.
